# Supplementary material for: Fluid-mediated, brittle–ductile deformation at seismogenic depth – Part 2: Stress history and fluid pressure variations in a shear zone in a nuclear waste repository (Olkiluoto Island, Finland)
Source: Copernicus journal article supplement (doi:10.5194/se-11-489-2020), 2020-04-08
Supplement: Supplementary file 1 [file se-11-489-2020-supplement.zip]

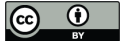

## *Supplement of*

# **Fluid-mediated, brittle–ductile deformation at seismogenic depth – Part 2: Stress history and fluid pressure variations in a shear zone in a nuclear waste repository (Olkiluoto Island, Finland)**

**Francesca Prando et al.**

*Correspondence to:* Francesca Prando ([francesca.prando@plymouth.ac.uk](mailto:francesca.prando@plymouth.ac.uk)) and Luca Menegon ([luca.menegon@geo.uio.no](mailto:luca.menegon@geo.uio.no))

- [se-11-489-2020-supplement-title-page.pdf](#)
- [Supplementary1.docx](#)
- [Supplementary2.xlsx](#)

The copyright of individual parts of the supplement might differ from the CC BY 4.0 License.
