# Supplementary material for: Fluid-mediated, brittle–ductile deformation at seismogenic depth – Part 2: Stress history and fluid pressure variations in a shear zone in a nuclear waste repository (Olkiluoto Island, Finland)
Source: Copernicus journal article supplement (doi:10.5194/se-11-489-2020), 2020-04-08
Supplement: Supplementary file 2 [file se-11-489-2020-supplement.zip]

Archive with 3 entries (3 files):
- Supplementary1.docx
- Supplementary2.xlsx
- se-11-489-2020-supplement-title-page.pdf
