# Supplementary material for: Fluid-mediated, brittle–ductile deformation at seismogenic depth – Part 2: Stress history and fluid pressure variations in a shear zone in a nuclear waste repository (Olkiluoto Island, Finland)
Source: Copernicus journal article supplement (doi:10.5194/se-11-489-2020), 2020-04-08
Supplement: Supplementary file 2 [file se-11-489-2020-supplement.zip › Supplementary1.docx]

# Supplementary 1

## EBSD

The EBSD data are presented as grain size maps, with a 10° misorientation threshold to define grain boundaries (in black), while low-angle boundaries are defined as having misorientation > 2° and < 10° and are displayed as white or cyan lines. Quartz c-axis orientation is presented as pole figures on equal area, lower hemisphere projections, and one point per grain. The XY plane of the pole figure is parallel to the shear zone foliation, X is parallel to the stretching lineation, and Z is normal to the foliation.

The grain size was measured as the diameter of a circle with equivalent area to the grain. The spread of the internal orientation of each grain was shown as Grain Orientation Spread (GOS) maps and was considered as a measure of the internal strain of the grain. A trade-off curve was used to calculate a threshold GOS value, which separates recrystallized grains from relict grains, following the procedure outlined in Cross et al. (2017). It is known that the GOS method has a slight grain size bias, which results in higher GOS values for larger grains (Cross et al., 2017). However, this bias has no impact on the ability to separate between relict and recrystallized grains where their size overlaps on the cumulative grain size distribution, and the GOS-based separation is considered robust (Cross et al., 2017).The average recrystallized grain size, calculated as root mean square (RMS), was used to apply the EBSD calibrated recrystallized grain size piezometer for quartz (Cross et al., 2017). Grain reference orientation deviation angle maps (GROD) were used to visualise subgrains only partially outlined by low-angle boundaries and to estimate their size. GROD maps are colour coded to show the angular deviation at each point of a grain from the average orientation of the grain

## Temperature estimation

Omnic software (Thermo Fisher Scientific) was used for Raman spectrum decomposition, using the software Lorentian/Gaussian function, following the procedure described in Koeketsu et al. (2009). Peaks with centre in position at~ 1580 cm-1, 1350 cm-1 and 1620 cm-1 were identified respectively as G, D1 and D2. R2 parameter, defined as the ratio between the peaks area D1/(D1+D2+G) was calculated for each measurements ( refer to S1 for the data of Raman spectra deconvolution).

A linear relationship between temperature and the Raman parameter R2 forms the basis of the CM geothermometer (Beyssac et al., 2002). Temperature can be estimated to ± 50° C in the range 330–650° C. Deformation can affect the internal disorder and underestimate the temperature obtained from the spectra analysis (Kirilova et al., 2017). To consider the possible role of deformation, analysis of CM both in the host rock and along the D4 mylonitic foliation were collected. Care was taken to avoid CM within cracks, and to prevent altered measurement from CM damaged during the thin section polishing, we performed measurements by focusing the laser beam on CM beneath the surface of a transparent adjacent grain as suggested in Beyssac et al. (2002). CM in the host rock was analysed using λ=473 nm, while CM in the mylonite was analysed using λ=532 nm. To avoid error in the temperature estimation we applied two different geothermometer calibrated for the different laser wavelength used to collect the data: Beyssac et al. (2002) for the λ=475 nm analysis and Aoya et al. (2010) for the λ=532 nm analysis. Although both give similar results, the equation given in Beyssac et al. (2002) for the Raman CM geothermometer is linear whereas that in Aoya et al. (2010) is quadratic.

The chosen chlorite thermometer semi-empirical equation (Lanari et al. 2014) require to have a constrain of the pressure at the time of formation of the chlorite. In section 4.4 we present the calculated TChl for the average P value, obtained from the Phengite geobarometer, which require to have stable K-feldspar next to the Phengite (Massonne and Schreyer,1987). As the geobarometer can constrain a range of P in which the chemical composition of Phengite could be stable, the TChl has been also determine for every 0.5 kbar of the obtained P range and standard deviation from the average were considered.
