# Supplementary material for: Fluid-mediated, brittle–ductile deformation at seismogenic depth – Part 2: Stress history and fluid pressure variations in a shear zone in a nuclear waste repository (Olkiluoto Island, Finland)
Source: Copernicus journal article supplement (doi:10.5194/se-11-489-2020), 2020-04-08
Supplement: Supplementary file 2 [file se-11-489-2020-supplement.zip › Supplementary2.xlsx]

## Sheet: Muscovites
EMPA wt% muscovite
SiO2		47.85	47.73	48.28	47.15	47.69	48.08	47.93	47.7	48.05	47.74	48.32	47.74	48.29	47.64	47.75	48.25	47.59	48.21	47.88	47.94	47.77	48.26	47.88	47.98	47.71	48.41	47.44	48.17	48.38	48.91	47.8	48.23	48.34	48.29	48.22	47.74	47.44	48.1	47.69	47.77	47.97	47.69	47.74	48.27	48.13	47.3	47.91	47.16
TiO2		0.0857	0.0858	0.0931	0.0531	0.0843	0.0975	0.1182	0.065	0.0872	0.0444	0.0873	0.1375	0.1183	0.0709	0.1138	0.1329	0.0532	0.124	0.0533	0.0739	0.0814	0.0517	0.0606	0.1079	0.0444	0.0991	0.0251	0.0725	0.1167	0.0975	0.0872	0.0207	0.0636	0.1212	0.0103	0.0163	0.0871	0.068	0.0488	0.0488	0.1152	0.0385	0.1211	0.0547	0.0148	0.0369	0.0399	0.0192
Al2O3		33.61	34.14	33.91	34.21	34.57	33.9	33.74	34.63	33.95	34.77	34.81	34.44	34.02	33.46	33.99	33.53	34.03	33.86	33.91	34.4	35.24	34.74	34.06	33.82	35.23	34.52	34.29	33.59	33.41	33.18	34.4	34.14	33.87	33.74	33.95	34.16	33.52	34.9	34.76	35.02	34.5	34.41	34.68	34.18	33.74	33.45	34.38	34.75
Cr2O3		0.0136	0.0195	0.0105	0.0026	0.0169	0	0	0.0315	0.0348	0	0.0064	0.0105	0.0055	0	0	0.0038	0	0	0.0159	0	0.0487	0.0665	0	0	0.0003	0.0166	0.027	0.0103	0	0.0108	0	0.0754	0.0019	0	0.0353	0	0.0496	0.0169	0.0184	0	0.0074	0.0115	0	0	0	0.0443	0.0005	0.0429
Fe2O3		0	0	0	0	0	0	0	0	0	0	0	0	0	0	0	0	0	0	0	0	0	0	0	0	0	0	0	0	0	0	0	0	0	0	0	0	0	0	0	0	0	0	0	0	0	0	0	0
FeO		2.56	2.06	2.54	2.6	2.12	2.43	2.47	2.46	2.4	2.09	1.88	2.17	1.95	2.84	2.36	2.42	2.34	2.71	2.19	2.06	1.78	2.16	2.27	2.2	1.79	2.08	2.56	2.18	2.24	2.61	2.22	2.33	2.3	2.2	2.02	2.44	2.36	1.97	2.18	2.07	2.13	2.13	2.45	2.42	2.18	2.37	1.94	2.25
MnO		0	0.0558	0.0604	0.0474	0	0.0008	0.0536	0.0229	0.0474	0.0306	0.0138	0	0.0375	0.029	0.0145	0.0359	0.0115	0.0519	0.013	0.0123	0	0.0313	0.0038	0	0.0153	0	0	0.0046	0.0229	0.0428	0	0.0696	0.0634	0.013	0.049	0.0023	0.0084	0	0.0421	0.016	0	0.0061	0.0306	0	0.0123	0.0168	0.039	0.0527
MgO		1.4808	1.4738	1.5629	1.5494	1.372	1.3833	1.4552	1.4087	1.3682	1.2923	1.3417	1.3478	1.3372	1.6569	1.4077	1.6262	1.5404	1.446	1.2215	1.2933	1.105	1.4585	1.4417	1.3604	1.1677	1.4109	1.4384	1.419	1.5261	1.84	1.4868	1.4884	1.5642	1.4743	1.4507	1.6125	1.5199	1.2889	1.4703	1.4179	1.2986	1.3619	1.4743	1.4707	1.4755	1.4299	1.394	1.3678
CaO		0.0251	0.0084	0.0167	0	0	0.005	0.0126	0.0284	0.0366	0.0413	0.0265	0.0035	0.0093	0.0096	0.0086	0.0262	0.0234	0	0.7666	0.0379	0.0225	0.0293	0.0055	0.0372	0.0162	0.0324	0	0.0098	0.025	0.0012	0.075	0.0143	0.0361	0.0332	0	0	0.0077	0	0.0157	0.0043	0.0105	0.0167	0.0088	0.0969	0.051	0.0141	0	0.0347
Na2O		0.1301	0.0879	0.0912	0.1144	0.1514	0.1364	0.0969	0.165	0.1428	0.1789	0.1428	0.1221	0.0973	0.1352	0.1309	0.1465	0.1161	0.1321	0.1519	0.1582	0.1512	0.1053	0.1255	0.141	0.1169	0.1628	0.1394	0.0967	0.088	0.0905	0.1638	0.1368	0.126	0.1262	0.1273	0.2109	0.145	0.1155	0.149	0.1112	0.1532	0.1263	0.1018	0.1204	0.1555	0.148	0.1352	0.1391
K2O		11.11	11.13	11.08	11.22	11.22	11.12	11.19	11.11	10.89	10.99	11.08	11.04	11.2	11.09	11.13	10.88	11.12	11.09	10.99	11.02	10.97	11.08	11.17	11.14	11.11	11.18	10.97	11.11	11.03	11.11	10.9	11.06	10.98	11.04	11.18	11.01	10.96	11.17	11.23	11.11	11.02	11.01	11.01	10.64	10.94	11.13	11.14	10.85
NiO		0	0.0246	0	0.0333	0	0.0356	0	0	0	0.0035	0	0	0.0143	0.0436	0	0.058	0	0.0058	0	0.0153	0.008	0.0115	0	0	0	0	0	0	0.0359	0	0	0	0	0	0.0311	0	0.0771	0	0.0338	0.0434	0.04	0	0	0.0437	0	0.0033	0.0104	0
Total		96.8653	96.8158	97.6449	96.9803	97.2246	97.1887	97.0666	97.6216	97.0071	97.1811	97.7086	97.0115	97.0795	96.9753	96.9056	97.1096	96.8247	97.6299	97.1923	97.011	97.1768	97.9942	97.0172	96.7866	97.2009	97.9119	96.89	96.663	96.8746	97.8928	97.1329	97.5653	97.3453	97.038	97.0738	97.1921	96.1749	97.6294	97.6381	97.6117	97.245	96.8011	97.6167	97.2965	96.6992	95.9434	96.9891	96.6665
Formula for 11 O
SiO2		3.15462	3.14112	3.15481	3.11165	3.12696	3.15577	3.15309	3.11932	3.15548	3.12684	3.14255	3.13381	3.16519	3.14438	3.14369	3.16647	3.13629	3.154	3.14531	3.14451	3.12167	3.13544	3.14685	3.1592	3.11947	3.14756	3.12503	3.17331	3.18016	3.18774	3.1333	3.15109	3.1627	3.16829	3.16311	3.13389	3.14785	3.13399	3.11647	3.11637	3.13993	3.13631	3.11887	3.15478	3.16746	3.14892	3.14373	3.10838
TiO2		0.00425052	0.00424793	0.00457671	0.00263633	0.00415834	0.00481441	0.00584982	0.0031978	0.0043081	0.00218778	0.00427137	0.00679032	0.00583342	0.00352052	0.00563645	0.00656145	0.0026376	0.006103	0.00263411	0.00364666	0.00400178	0.00252697	0.00299634	0.00534484	0.002184	0.00484741	0.00124388	0.00359312	0.00577099	0.00478065	0.00430019	0.00101744	0.00313044	0.00598228	0.000508302	0.000804981	0.00434795	0.00333318	0.00239912	0.00239503	0.00567283	0.0019048	0.00595191	0.00268953	0.000732747	0.00184809	0.00196965	0.000952047
Al2O3		2.61149	2.64796	2.61149	2.66083	2.67147	2.62238	2.61594	2.669	2.62765	2.684	2.66818	2.66445	2.62803	2.60282	2.63738	2.59338	2.64312	2.61076	2.62538	2.6593	2.71408	2.66009	2.63828	2.62449	2.71481	2.64524	2.66215	2.60796	2.5883	2.54869	2.65759	2.62882	2.61168	2.60896	2.62472	2.64286	2.62137	2.67999	2.67714	2.69256	2.66149	2.66705	2.67023	2.63281	2.61695	2.62453	2.65877	2.69941
Cr2O3		0.000708886	0.00101461	0.000542462	0.000135661	0.000876103	0	0	0.00162864	0.00180686	0	0.000329086	0.000544945	0.000285022	0	0	0.000197167	0	0	0.00082581	0	0.00251614	0.00341591	0	0	1.55084e-05	0.000853337	0.0014062	0.000536472	0	0.000556522	0	0.00389482	9.82828e-05	0	0.00183078	0	0.0026021	0.000870588	0.000950664	0	0.000382962	0.000597947	0	0	0	0.00233173	2.59396e-05	0.00223558
Fe2O3		0	0	0	0	0	0	0	0	0	0	0	0	0	0	0	0	0	0	0	0	0	0	0	0	0	0	0	0	0	0	0	0	0	0	0	0	0	0	0	0	0	0	0	0	0	0	0	0
FeO		0.141147	0.113378	0.138806	0.1435	0.116252	0.133388	0.135892	0.134538	0.131811	0.114482	0.102254	0.119129	0.106892	0.156765	0.129941	0.132819	0.128969	0.148273	0.120316	0.113003	0.0972792	0.117364	0.124772	0.121146	0.0978799	0.113102	0.141032	0.120105	0.12314	0.142264	0.121701	0.127311	0.125848	0.120714	0.110817	0.133955	0.130963	0.107346	0.119141	0.112936	0.1166	0.117149	0.13386	0.132274	0.119983	0.131952	0.106461	0.124025
MnO		0	0.00311038	0.00334295	0.00264956	0	4.44751e-05	0.00298662	0.00126842	0.00263656	0.00169758	0.000760188	0	0.0020819	0.00162124	0.000808576	0.00199553	0.000641925	0.00287593	0.000723334	0.000683353	0	0.00172243	0.000211539	0	0.000847324	0	0	0.000256673	0.00127498	0.00236274	0	0.00385157	0.00351339	0.000722432	0.00272251	0.000127884	0.0004721	0	0.00233026	0.000884097	0	0.000339788	0.00169326	0	0.000685625	0.000947318	0.00216756	0.0029421
MgO		0.145536	0.144591	0.152247	0.152434	0.13411	0.135353	0.142712	0.137332	0.133947	0.126182	0.130083	0.131894	0.130662	0.163031	0.138162	0.159097	0.151337	0.141028	0.119623	0.126463	0.107648	0.141263	0.141256	0.133535	0.113819	0.136756	0.141254	0.139357	0.149547	0.178778	0.145291	0.144968	0.152565	0.1442	0.141865	0.157802	0.150347	0.125194	0.143236	0.137895	0.126717	0.13352	0.143586	0.143294	0.144759	0.141911	0.136362	0.134398
CaO		0.00177301	0.000592307	0.00116922	0	0	0.00035163	0.000888123	0.00198991	0.0025753	0.00289833	0.00184661	0.000246168	0.000653129	0.000678905	0.000606651	0.00184227	0.00165231	0	0.0539576	0.00266359	0.00157539	0.00203964	0.000387309	0.00262442	0.00113491	0.00225714	0	0.00069173	0.00176075	8.37994e-05	0.00526756	0.00100104	0.00253065	0.00233389	0	0	0.000547437	0	0.00109928	0.000300564	0.0007364	0.00117675	0.000615987	0.00678563	0.00359617	0.00100576	0	0.00245055
Na2O		0.0166298	0.0112157	0.0115544	0.0146379	0.0192471	0.017358	0.0123594	0.0209204	0.0181821	0.0227184	0.0180065	0.01554	0.0123651	0.0173015	0.016709	0.0186406	0.0148346	0.0167561	0.0193469	0.0201189	0.019157	0.0132643	0.0159922	0.0180003	0.0148194	0.0205229	0.017804	0.0123511	0.0112153	0.0114361	0.0208177	0.017329	0.0159833	0.0160536	0.0161905	0.0268425	0.0186544	0.0145908	0.0188785	0.0140651	0.0194426	0.0161042	0.0128946	0.0152568	0.0198413	0.0191032	0.0172005	0.0177759
K2O		0.934405	0.934426	0.92364	0.944622	0.938522	0.931113	0.939107	0.926856	0.912341	0.918284	0.919289	0.924519	0.936518	0.933795	0.934799	0.910884	0.934892	0.925578	0.921009	0.92213	0.914523	0.918349	0.93655	0.935746	0.926707	0.927337	0.921876	0.933699	0.924942	0.923754	0.911501	0.921838	0.916451	0.924045	0.935591	0.92203	0.927761	0.928458	0.936207	0.924622	0.920213	0.92371	0.917611	0.887136	0.918479	0.945261	0.932527	0.912318
NiO		0	0.00130234	0	0.00176787	0	0.0018797	0	0	0	0.000184411	0	0	0.000754005	0.00231498	0	0.00306198	0	0.000305246	0	0.000807313	0.000420551	0.000601044	0	0	0	0	0	0	0.00189834	0	0	0	0	0	0.00164114	0	0.00411547	0	0.00177684	0.00227761	0.00210623	0	0	0.00229758	0	0.00017673	0.000548971	0
H2O		0	0	0	0	0	0	0	0	0	0	0	0	0	0	0	0	0	0	0	0	0	0	0	0	0	0	0	0	0	0	0	0	0	0	0	0	0	0	0	0	0	0	0	0	0	0	0	0
		7.01055	7.00296	7.00219	7.03486	7.01159	7.00246	7.00882	7.01605	6.99074	6.99947	6.98757	6.99693	6.98926	7.02623	7.00773	6.99495	7.01438	7.00568	7.00913	6.99332	6.98287	6.99608	7.00729	7.00009	6.99169	6.99847	7.01179	6.99187	6.988	7.00045	6.99977	7.00112	6.9945	6.9913	6.999	7.01831	7.00903	6.99377	7.01963	7.0043	6.99329	6.99787	7.00531	6.97732	6.99249	7.01799	6.99976	7.00489
Position		PH28_7a-1	PH28_7a-2	PH28_7a-3	PH28_7a-4	PH28_7a-5	PH28_7b-1	PH28_7b-2	PH28_7b-3	PH28_7b-4	PH28_7b-5	PH28_5a-1	PH28_5a-2	PH28_5a-3	PH28_5a-4	PH28_5a-5	PH28_5a-6	PH28_5a-7	PH28_5a-8	PH28_5a-9	PH28_5a-10	PH28_5a-11	PH28_5a-12	PH28_5a-13	PH28_5a-14	PH28_5a-15	PH28_5b-1	PH28_5b-2	PH28_5b-3	PH28_5b-4	PH28_5b-5	PH28_5b-6	PH28_5b-7	PH28_5b-8	PH28_5b-9	PH28_5b-10	PH28_5b-11	PH28_5b-12	PH28_5b-13	PH28_5b-15	PH28_5b-16	PH28_5b-17	PH28_5b-19	PH28_5b-20	PH28_5c-1	PH28_5c-2	PH28_5c-3	PH28_5c-4	PH28_5c-5
[truncated: 38 more columns]

## Sheet: Chlorite
EMPA wt% chlorite
	Mylonite																							Cataclasite																								Veins
	Chemical composition (wt%)
	PH16_2_1	PH16_2_2	PH16_2_3	PH16_2_4	PH16_2_5	PH16_2_6	PH16_2_7	PH16_2_8	PH16_2_9	PH28_10-1	PH28_10-3	PH28_10-4	PH28_10-5	PH28_10-6	PH28_10-7	PH28_10-8	PH28_10-9	PH28_10-10	PH28_10-11	PH28_10-12	PH28_10-13	PH28_10-14	PH28_10-15		PH28_9_1	PH28_9_2	PH28_9_3	PH28_9_4	PH28_9_5	PH28_9_6	PH28_9_7	PH28_9_8	PH28_9_9	PH28_9_10	PH28_9_11	PH28_9_12	PH28_9_13	PH28_9_14	PH28_9_15	PH28_9_16	PH28_9_17	PH28_9_18	PH28_9_19	PH28_9_20	PH28_9_21	PH28_9_22	PH28_9_23		PH28_6-1
SiO2	25.77	25.04	25.08	25.24	25.82	25.86	24.77	25.66	28	25.83	24.79	24.75	24.21	24.55	24.53	24.5	24.72	24.86	24.72	25.25	25.27	25.24	24.79		23.51	23.65	23	23.68	23.6	23.42	23.8	23.13	23.78	23.29	23.95	23.97	25.31	23.48	23.36	23.71	24.37	23.29	24.17	23.52	23.97	24.6	24.56		24.43
TiO2	0	0.0344	0.0522	0.0384	0.0343	0.0673	0.0274	0.0795	0	0.0808	0.0784	0.0784	0.0027	0.0432	0.0135	0	0	0.0662	0.061	0.0501	0.0258	0.0299	0.0595		0.0579	0.0377	0.0523	0.0862	0.0309	0.0363	0.1153	0.0685	0.1021	0.0495	0.0712	0.0741	0.0082	0.043	0.1211	0.0336	0.0377	0.0041	0.0095	0.0858	0.0994	0.0417	0.0445		0.0566
Al2O3	22.26	21.6	22.2	22.08	22.29	21.75	21.46	21.41	21.17	21.75	21.89	21.76	21.64	21.96	21.73	22.06	22.08	22.28	22.43	22.14	22.14	22.4	22.14		23.26	22.77	23.6	22.32	22.15	22.69	22.42	21.99	22.7	22.44	21.38	22	21.37	22.04	22.38	22.96	21.82	22.85	21.99	23.16	23.51	22.88	20.68		21.88
FeO	29.49	28.7	28.79	30.42	29.93	29.62	29.33	29.75	30.04	29.85	35.83	35.33	35.56	35.7	35.53	34.69	34.16	35.18	33.87	34.09	34.8	33.67	34.6		37.03	37.4	39.14	36.57	38.53	37.3	39.65	37.83	38.1	39.15	37.95	37.36	30.53	38.6	37.35	38.48	36.8	37.53	34.36	36.43	36.86	36.56	37.36		36.57
MnO	0.3404	0.1728	0.2251	0.2904	0.3491	0.2599	0.2904	0.2611	0.2996	0.4804	0.9178	0.8758	0.8718	0.9824	0.9405	0.7887	0.8558	0.9257	0.8215	0.8618	0.761	0.7995	0.8578		1.1117	0.9956	0.7346	1.0826	0.8455	0.91	0.81	0.7766	0.6879	0.7927	0.7906	0.6809	0.5501	0.7778	1.0738	0.7908	1.1403	0.9048	0.6754	1.056	0.8483	0.9412	1.0413		0.9811
MgO	12.63	12.01	12.17	11.21	11.74	12.44	11.37	12.2	12.26	12.19	7.57	7.75	8.02	7.52	7.61	8.26	8.32	7.58	8.52	7.72	8.02	8.24	8.43		5.82	5.04	3.94	5.71	4.81	5.44	3.78	4.73	3.97	3.9	4.86	5.59	10.68	4.41	5.43	4.75	5.72	5.3	7.73	5.71	5.81	5.92	6.53		6.72
CaO	0.029	0.0474	0.0339	0.0767	0.0613	0.0206	0.1203	0.0285	0.058	0.0197	0.1207	0.1675	0.1205	0.094	0.0472	0.0501	0.0374	0.1539	0.1278	0.1218	0.0935	0.0864	0.0557		0.0016	0.0116	0.0193	0.0194	0.0084	0.0109	0.0014	0.0152	0.0534	0.0034	0.0082	0.0011	0.0159	0.0111	0.0424	0.02	0	0.0299	0	0.0152	0.0339	0.0122	0.0227		0.0537
Na2O	0.0177	0.0136	0	0.0556	0.0546	0.015	0.0594	0.0105	0.0583	0.0487	0.0103	0.0256	0.0766	0.0436	0.0485	0	0.0256	0.0477	0.0235	0.0496	0.0247	0.0269	0		0	0.0326	0.0214	0.0429	0	0.0252	0.0458	0	0.0766	0.0361	0.0913	0.0241	0.0258	0	0	0	0	0.0188	0.0108	0.0166	0	0.0328	0.0092		0.0226
K2O	0.0345	0.0639	0.0438	0.0616	0.0469	0.0461	0.0844	0.0176	0.0246	0.0246	0.0195	0	0.0028	0.0008	0	0.0037	0.0212	0.0133	0.0167	0.084	0.0237	0.0748	0.0399		0.0404	0.0371	0	0.0228	0.0213	0.0233	0	0.005	0	0.0799	0	0.0095	0.001	0.0283	0.011	0.0547	0.0235	0.0294	0.0869	0.1012	0.0552	0.1732	0		0.0115
	90.5918	87.7025	88.697	89.5132	90.3643	90.0814	87.5584	89.4668	91.9878	90.3344	91.2357	90.8052	90.5475	90.9138	90.5384	90.4106	90.2261	91.2296	90.603	90.3814	91.2422	90.5676	90.973		90.8317	90.0134	90.5077	89.534	90.0494	89.8558	90.6549	88.6402	89.4701	89.7417	89.1254	89.7098	88.5262	89.4039	89.7795	90.7991	89.9116	89.9571	89.0327	90.0949	91.1928	91.2046	90.2626		90.7317
	Structural formulae on the basis of 14 O
Si	2.6771	2.6865	2.6589	2.6734	2.6952	2.7043	2.6774	2.7078	2.8556	2.7005	2.6578	2.6614	2.6203	2.6429	2.6515	2.6366	2.6569	2.6558	2.6401	2.7044	2.6875	2.689	2.6468		2.5546	2.5998	2.534	2.6096	2.6098	2.579	2.6242	2.5965	2.6351	2.5952	2.67	2.6397	2.717	2.6183	2.5797	2.5923	2.6727	2.5653	2.641	2.5708	2.5827	2.6469	2.6935		2.6482
Ti	0	0.0028	0.0042	0.0031	0.0027	0.0053	0.0022	0.0063	0	0.0064	0.0063	0.0063	0.0002	0.0035	0.0011	0	0	0.0053	0.0049	0.004	0.0021	0.0024	0.0048		0.0047	0.0031	0.0043	0.0071	0.0026	0.003	0.0096	0.0058	0.0085	0.0041	0.006	0.0061	0.0007	0.0036	0.0101	0.0028	0.0031	0.0003	0.0008	0.0071	0.0081	0.0034	0.0037		0.0046
Al	2.7254	2.7312	2.7739	2.7563	2.7422	2.6806	2.7338	2.6628	2.5446	2.6801	2.766	2.7577	2.7603	2.7863	2.7683	2.7978	2.797	2.8052	2.8232	2.7948	2.775	2.8126	2.786		2.9788	2.9499	3.0645	2.899	2.8869	2.9449	2.9134	2.9092	2.9647	2.9469	2.8091	2.8554	2.7037	2.8966	2.9129	2.9586	2.8203	2.9663	2.8319	2.9836	2.9854	2.9014	2.6729		2.7953
Fe(3+)	0	0	0	0	0	0	0	0	0	0	0	0	0	0	0	0	0	0	0	0	0	0	0		0	0	0	0	0	0	0	0	0	0	0	0	0	0	0	0	0	0	0	0	0	0	0		0
Fe(2+)	2.562	2.5751	2.5526	2.6945	2.6128	2.5904	2.6513	2.6254	2.5621	2.6099	3.2125	3.1771	3.2186	3.2141	3.2118	3.122	3.0705	3.143	3.0251	3.0535	3.0951	2.9998	3.0894		3.365	3.4382	3.6063	3.3704	3.5633	3.4351	3.6561	3.5514	3.5308	3.6483	3.5381	3.4407	2.7408	3.5997	3.4495	3.5184	3.3752	3.457	3.1398	3.3301	3.3213	3.2897	3.4265		3.3152
Mn	0.03	0.0157	0.0202	0.0261	0.0309	0.023	0.0266	0.0233	0.0259	0.0425	0.0833	0.0798	0.0799	0.0896	0.0861	0.0719	0.0779	0.0838	0.0743	0.0782	0.0685	0.0721	0.0776		0.1023	0.0927	0.0686	0.1011	0.0792	0.0849	0.0756	0.0738	0.0646	0.0748	0.0747	0.0635	0.05	0.0735	0.1004	0.0732	0.1059	0.0844	0.0625	0.0978	0.0774	0.0858	0.0967		0.0901
Mg	1.956	1.9209	1.9234	1.77	1.8269	1.9393	1.8321	1.9192	1.864	1.8999	1.2099	1.2423	1.294	1.2069	1.2263	1.3251	1.3331	1.2072	1.3565	1.2326	1.2715	1.3087	1.3418		0.9428	0.8259	0.6471	0.9381	0.793	0.8931	0.6213	0.7915	0.6558	0.6478	0.8077	0.9177	1.7092	0.7331	0.8939	0.7742	0.9352	0.8703	1.2592	0.9304	0.9332	0.9496	1.0676		1.0859
Ca	0.0032	0.0054	0.0039	0.0087	0.0069	0.0023	0.0139	0.0032	0.0063	0.0022	0.0139	0.0193	0.014	0.0108	0.0055	0.0058	0.0043	0.0176	0.0146	0.014	0.0107	0.0099	0.0064		0.0002	0.0014	0.0023	0.0023	0.001	0.0013	0.0002	0.0018	0.0063	0.0004	0.001	0.0001	0.0018	0.0013	0.005	0.0023	0	0.0035	0	0.0018	0.0039	0.0014	0.0027		0.0062
Na	0.0036	0.0028	0	0.0114	0.0111	0.003	0.0124	0.0021	0.0115	0.0099	0.0021	0.0053	0.0161	0.0091	0.0102	0	0.0053	0.0099	0.0049	0.0103	0.0051	0.0056	0		0	0.0069	0.0046	0.0092	0	0.0054	0.0098	0	0.0165	0.0078	0.0197	0.0051	0.0054	0	0	0	0	0.004	0.0023	0.0035	0	0.0068	0.002		0.0047
K	0.0046	0.0087	0.0059	0.0083	0.0062	0.0062	0.0116	0.0024	0.0032	0.0033	0.0027	0	0.0004	0.0001	0	0.0005	0.0029	0.0018	0.0023	0.0115	0.0032	0.0102	0.0054		0.0056	0.0052	0	0.0032	0.003	0.0033	0	0.0007	0	0.0114	0	0.0013	0.0001	0.004	0.0015	0.0076	0.0033	0.0041	0.0121	0.0141	0.0076	0.0238	0		0.0016
Xfe	0.567065	0.572754	0.570286	0.603539	0.588508	0.57187	0.591359	0.577697	0.578862	0.578717	0.726416	0.718898	0.713247	0.727007	0.723688	0.702031	0.69727	0.722496	0.69041	0.712419	0.708812	0.696252	0.697193		0.781141	0.806313	0.847863	0.782268	0.817965	0.793656	0.854748	0.817749	0.843357	0.849212	0.814142	0.789441	0.61591	0.830802	0.794193	0.819643	0.783036	0.798882	0.713753	0.781622	0.780656	0.776001	0.762444		0.753266
[truncated: 13 more columns]

## Sheet: CM Raman
		G				D1				D2
		G Position Mean	SD	G Area Mean	SD	D1 Position Mean	SD	D1Area Mean	SD	D2 Position Mean	SD	D2 Area Mean	SD	R2 Average	T °C
	PH-16_1	1580.01	0.70662	4487.99	1155.73	1350.32	1.55073	4543.4	2794.35	1614.27	2.27789	1139	346.257	0.394026	457
	PH-16_2	1579.12	0.662453	6510.12	2478.81	1351.15	0.830772	7306.84	5576.49	1616.33	2.71092	809.842	752.184	0.454876	430
	PH-28_10	1580.12	0.383109	8146.04	3117.61	1349.71	0.940809	6750.69	3403.79	1615.28	1.92979	751.288	332.34	0.415415	443
	PH-21	1584.4	0.874263	2229888866	1.45052e+09	2190.31	3180.74	9.24392e+08	8.16329e+08	1619.9	9.88818	2.16848e+08	1.27626e+08	0.242667	530
	Spectrum number	G		D1		D2		R2
		Position (cm -1)	area	Position (cm -1)	area	Position (cm -1)	area	D1/(G+D1+D2)
	PH-16_1-2	1579.38	3607.8	1349.44	6654.71	1615.15	1261.54	0.521812
	PH-16_1-6	1580.83	4844.48	1351.59	2853.49			0.326907
	PH-16_1-8	1579.15	6662.8	1351.87	1543.8			0.188117
	PH-16_1-9	1579.38	3607.8	1351.71	2522.93	1610.87	733.418	0.367552
	PH-16_1-17	1580.12	4574.44	1347.95	5182.18			0.305177
	PH-16_1-25	1580.83	4844.48	1348.92	9540.68	1615.32	1545.2	0.598899
	PH-16_1-26	1580.36	3274.14	1350.73	3506	1615.74	1015.85	0.449719
	PH-16_2-7	1579.95	5794.36	1352.28	4450.77	1616.71	427.904	0.41701
	PH-16_2-8	1578.7	3148.46	1351.71	2204.21	1610.61	290.772	0.39058
	PH-16_2-9	1579.59	6876.32	1352.14	14847.5	1612.99	2449.54	0.61421
	PH-16_2-11	1579.22	5750.96	1350.49	4962.73	1614.93	598.74	0.438697
	PH-16_2-14	1578.89	2503.52	1350.86	1542.78	1613.58	183.156	0.364771
	PH-16_2-15	1579.5	7292.08	1351.45	9510.57	1619.71	625.514	0.545701
	PH-16_2-16	1580.41	10048.4	1352.65	22578.7	1616.95	2812.12	0.63711
	PH-16_2-18	1578.93	6351.25	1350	7533.46	1617.97	702.302	0.51645
	PH-16_2-19	1579.49	6092.94	1350.33	9013.92	1617.44	958.919	0.561064
	PH-16_2-20	1579.86	9339.28	1351.49	10681.1	1620.19	725.699	0.514849
	PH-16_2-21	1578.16	11869.9	1349.46	12244.7	1617.37	855.159	0.490382
	PH-16_2-23	1579.09	9563.97	1351.08	5637.45	1613.12	788.48	0.352563
	PH-16_2-25	1577.96	5650.26	1351.66	2834.48	1614.93	346.851	0.320947
	PH-16_2-26	1579.11	4875.09	1351.17	3271.45	1617.32	274.724	0.388475
	PH-16_2-27	1578.72	4607.37	1351.24	1497.98			0.245355
	PH-16_2-30	1579.35	6190.24	1350.61	8251.23	1618.65	695.27	0.545113
	PH-16_2-32	1578.18	4717.65	1350.84	3153.2	1618.85	222.317	0.389613
	PH-28_10-8	1580.18	3866.49	1352.25	2610.52	1614.4	471.369	0.375702
	PH-28_10-9	1579.91	8269.4	1349.66	5090.12	1615.65	640.466	0.363581
	PH-28_10-10	1580	10360.6	1348.8	7696.7	1616.59	695.805	0.410422
	PH-28_10-11	1580.94	6466.02	1349.67	4591.56	1616.28	432.253	0.399619
	PH-28_10-12	1579.56	10910.9	1349.02	8994.14	1612.9	1398	0.422199
	PH-28_10-13	1580.28	10696.5	1349.18	10589.1	1617.9	737.168	0.480824
	PH-28_10-14	1579.9	3816.72	1349.33	2503.02	1611.03	436.587	0.37047
	PH-28_10-15	1580.59	11799.8	1349.11	10494.8	1616.1	836.178	0.453717
	PH-28_10-16	1580.16	10721.4	1350.18	10736.9	1614.7	1288.25	0.472021
	PH-28_10-17	1579.91	8778.77	1349.62	8592.47	1616	865.012	0.471175
	PH-28_10-18	1579.84	3919.68	1349.97	2358.29	1616.5	463.084	0.34984
	PH21- analysed area I_1	1583	890496406	1365	538553672	1620	232162832	0.32
	PH21- analysed area I_2	1583	704897422	1366	405618125	1623	196560508	0.31
	PH21- analysed area I_3	1584.4	756736016	13688	115616826	1619.96	73069175	0.12
	PH21- analysed area I_4	1584.37	145862480	1370.34	54265518	1587.81	177485605	0.14
	PH21- analysed area I_5	1584.24	3644364688	1366.93	1487799375	1626.62	288296445	0.27
	PH21- analysed area II_1	1585.93	1891287656	1375.55	220490352	1620.86	54941978	0.1
	PH21- analysed area II_2	1583.36	2674205313	1365.29	697908125	*		0.21
	PH21- analysed area II_3	1584.11	3267111875	1365.9	1239402813	1623	245525879	0.26
	PH21- analysed area II_4	1585.14	538598164	1382.74	141352705	*		0.21
	PH21- analysed area II_5	1584.7	1706208906	1366.43	1199495469	1625	226466484	0.38
	PH21- analysed area II_6	1584.81	1881024063	1367.55	222721660	1623.8	54208647	0.35
	PH21- analysed area III_1	1585.93	3421265313	1375.57	1572514375	1619.31	265501328	0.1
	PH21- analysed area III_2	1584.41	3442113438	1366.61	1271852344	1622.29	133545605	0.3
	PH21- analysed area III_3	1584.09	3470301875	1366.32	1734726875	1625.01	369023984	0.26
	PH21- analysed area III_4	1584.47	5013859375	1366.42	2963563750	1622.1	502232422	0.31
